# Supplementary material for: Gut microbiota-mediated generation of saturated fatty acids elicits inflammation in the liver in murine high-fat diet-induced steatohepatitis
Source: PubMed Central journal article supplement (PMC5708095; doi:10.1186/s12876-017-0689-3), 2017-11-29
Supplement: 12876_2017_689_MOESM3_ESM.pdf [file 12876_2017_689_MOESM3_ESM.pdf]

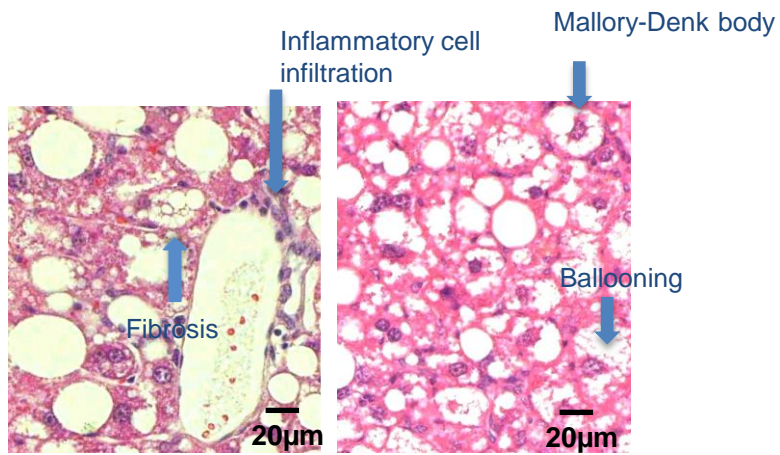

Supplemental information 3
