# Supplementary material for: Gut microbiota-mediated generation of saturated fatty acids elicits inflammation in the liver in murine high-fat diet-induced steatohepatitis
Source: Springer Nature journal article supplement (doi:10.1186/s12876-017-0689-3), 2017-11-29
Supplement: MOESM1 [file 15265758]

|                  |   |                            |
|------------------|---|----------------------------|
| $\alpha$ -SMA    | F | GACGCTGAAGTATCCGATAGAACACG |
|                  | R | CACCATCTCCAGAGTCCAGCACAAT  |
| Col 1 $\alpha$ 1 | F | GGAGGGCGAGTGCTGTGCTTT      |
|                  | R | GGGACCAGGAGGACCAGGAAGT     |
| IL-1 $\beta$     | F | TCACAGCAGCACATCAACAA       |
|                  | R | TGCCTCATCCTGGAAGGTC        |
| TNF- $\alpha$    | F | CACGCTCTTCTGTCTACTGAACTTC  |
|                  | R | ATGATCTGAGTGTGAGGGTCTGG    |
| GAPDH            | F | GTGTCCGTCGTGGATCTGA        |
|                  | R | CCTGCTTCACCACCTTCTTGA      |

## Supplemental information 1
